# Supplementary material for: MetaDOCK: A Combinatorial Molecular Docking Approach
Source: PubMed Central journal article supplement — ACS Omega. 2023 Jan 31;8(6):5850–60. doi: 10.1021/acsomega.2c07619 (PMC9933224; doi:10.1021/acsomega.2c07619), 2023-01-31
Supplement: ao2c07619_si_001.pdf [file ao2c07619_si_001.pdf]

**SUPPORTING INFORMATION FILE**

**MetaDOCK: A Combinatorial Molecular Docking  
Approach**

**Izaz Monir Kamal<sup>1, 2</sup> and Saikat Chakrabarti<sup>1, 2, \*</sup>**

**Figure S1**

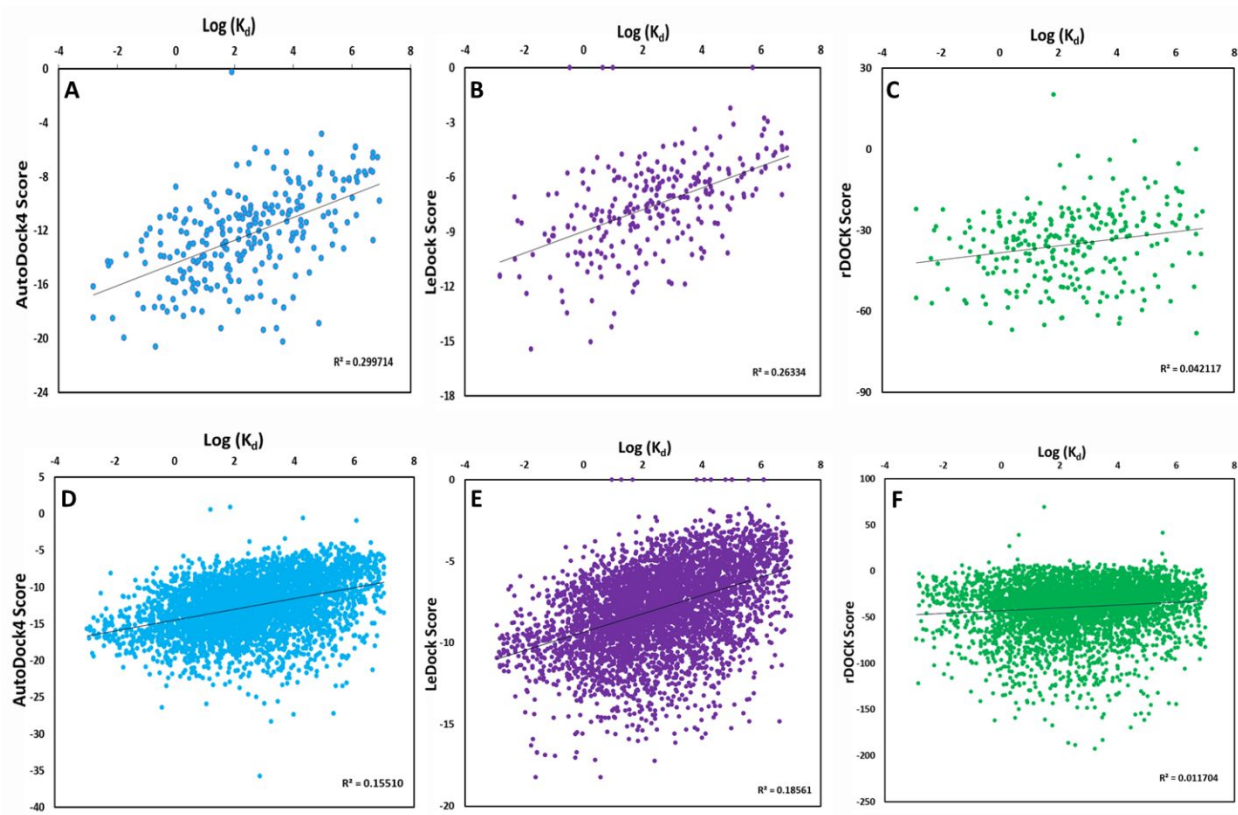

**Figure S1: Scoring power analysis and comparison.** Scatter plots of the docking scores and the experimental binding free energies ( $\log K_d$ ) for the core (A-C) and refined sets (D-F), respectively. Trend line is colored in black while the correlation coefficients between docking scores and experimental binding free energies are represented by  $R^2$  values. Panels A-D, B-E, and C-F show data for AutoDock4, LeDock, and rDOCK, respectively.

**Figure S2**

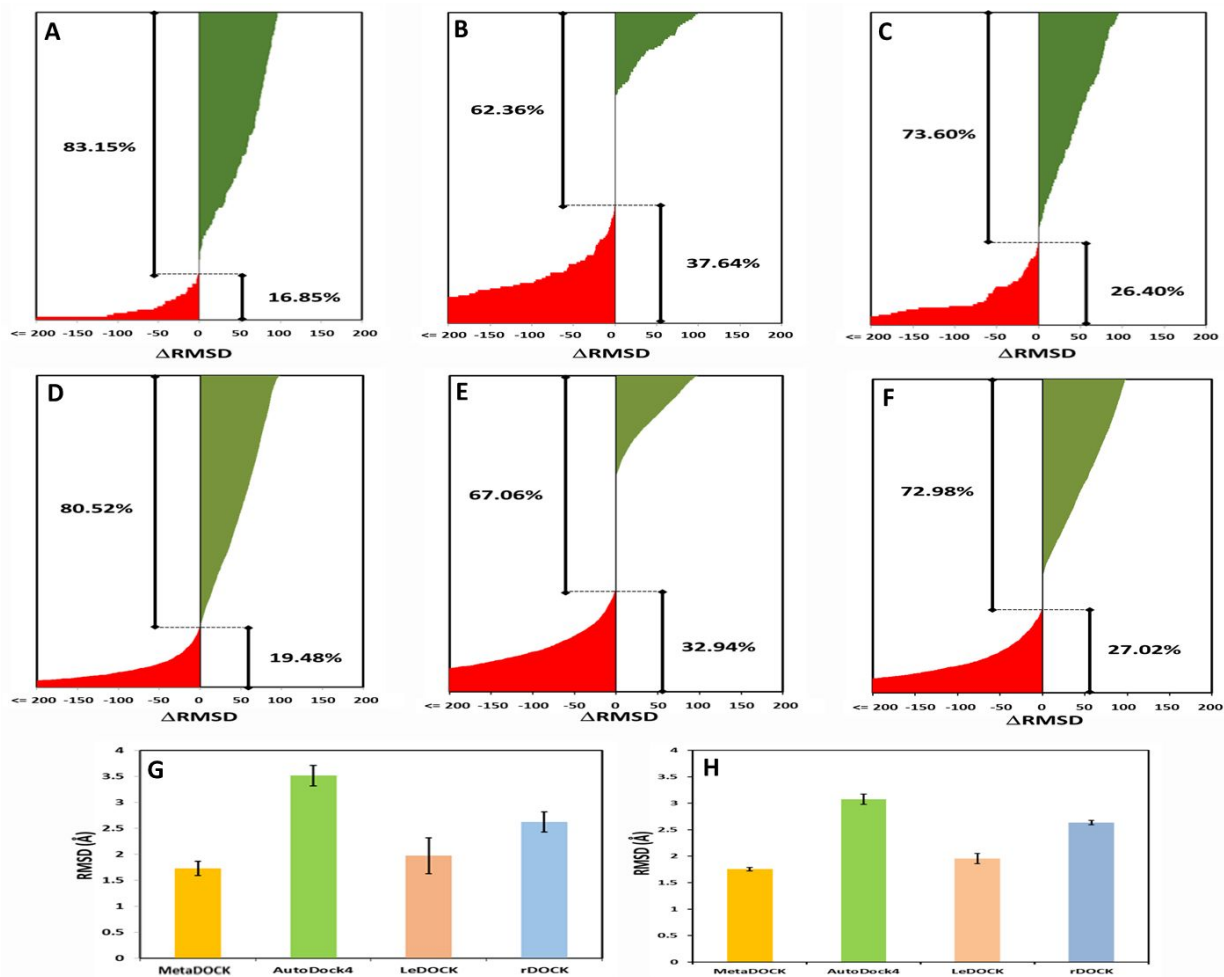

**Figure S2: Posing power analysis for the MetaDOCK component programs.** Difference of RMSD of the complexes generated by AutoDock4, LeDOCK, and rDOCK, respectively with respect to the most likely complex derived from the MetaDOCK approach is plotted for core (A-C) and refined (D-F) datasets, respectively. Positive  $\Delta$ RMSD (green color) indicates better RMSD value of the MetaDOCK complex with respect to the same derived from the individual component programs. Average RMSDs of the docked complexes with respect to their corresponding original complexes are shown in panels G and H for the core and refined datasets, respectively. Error bars indicate standard error.

Figure S3

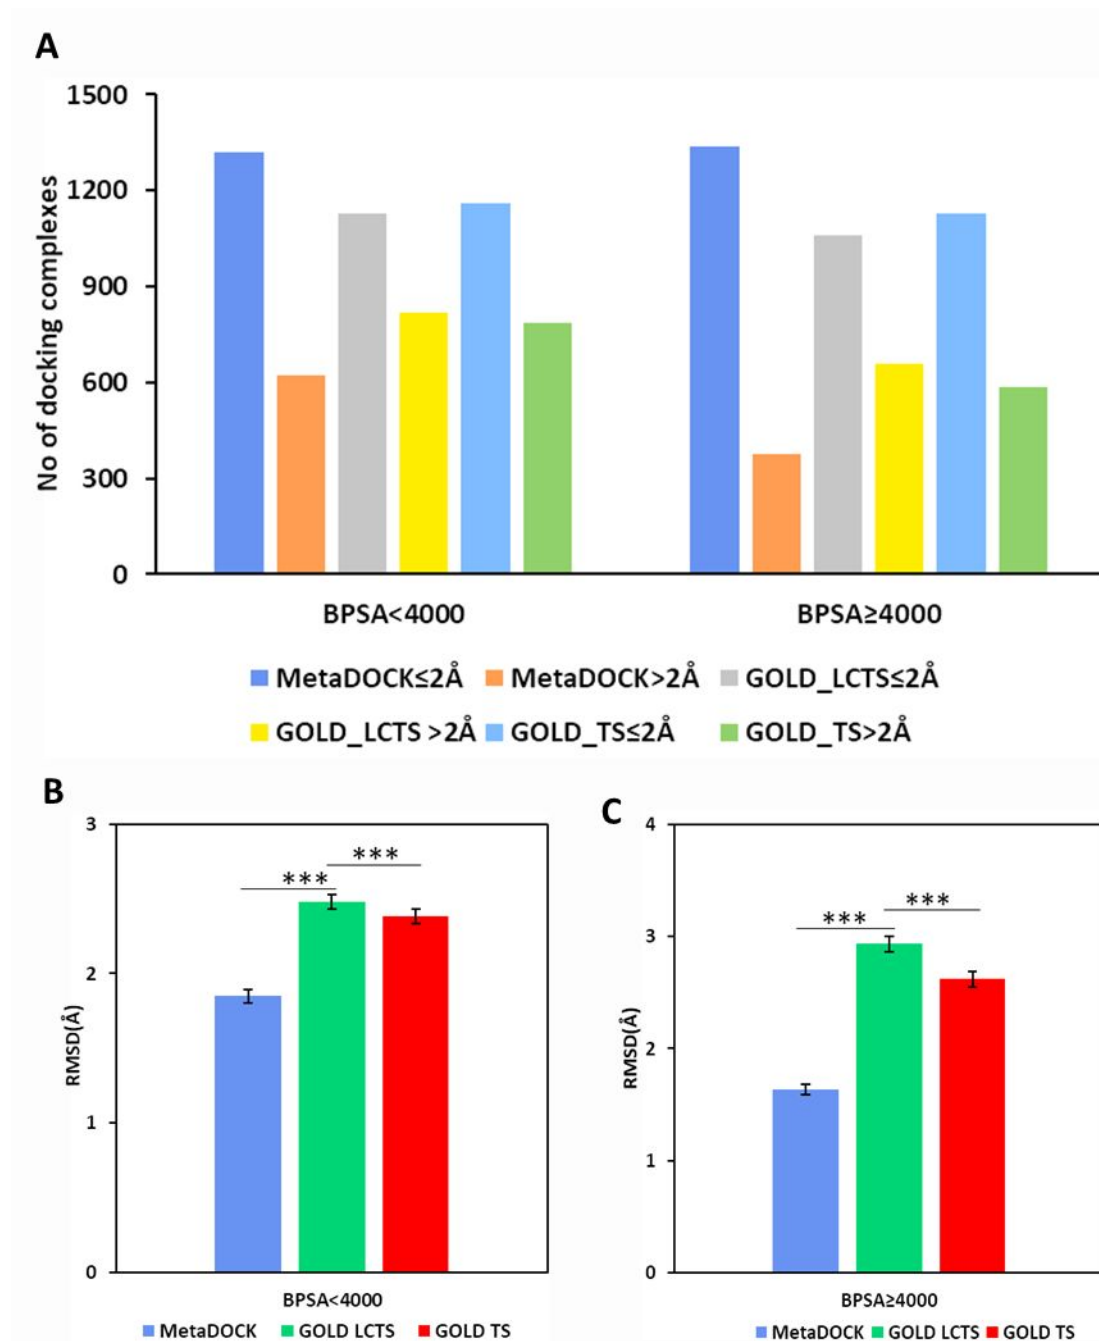

**Figure S3: Binding Pocket Surface Area (BPSA) based docking performance analysis and comparison.** Panel A plots the number of successful docking complexes (RMSD  $\leq 2$  Å) and complexes with RMSD  $> 2$  Å for two categories of binding pocket surface area (BPSA) of the ligands, BPSA  $< 4000$  Å<sup>2</sup>, and BPSA  $\geq 4000$  Å<sup>2</sup>. Panels B-C plot average RMSD of the docked complexes with respect to their corresponding original complexes for the two BPSA categories. \*\*\* indicates p-value  $\leq 0.001$ .

Figure S4

**Input**

**Running**

**Result**

**3D Visualization Download**

• Score/Binding energy of the Top3  
 Rank1 : -7.94588 Kcal/mol  
 Rank2 : -7.74567 Kcal/mol  
 Rank3 : -7.64825 Kcal/mol  
 • Download Rank1 complex [file1](#)  
 Rank2 complex [file2](#)  
 Rank3 complex [file3](#)

**MetaDOCK**  
 A Protein small-molecule Molecular Docking Approach  
 Sakat Lab, CSIR-ICR, CSIR, INDIA

**Upload files**  
 Select a protein file, a ligand file and a binding site to upload (follow example files)  
 Select file: **Step1**  
 Choose File: [No file chosen]  
 Receptor filename: \*.pdb  
 \* could be any name for protein file  
 Choose File: [No file chosen]  
 Ligand filename: \*.mol2  
 \* could be any name for ligand file  
 Choose File: [No file chosen]  
 Binding site filename: \*.site\_3d.txt

**Help**  
 Receptor file preparation: Receptor file must be in pdb format.  
 Ligand file preparation: Ligand file must be in mol2 format.  
 Convert pdb file format to mol2 file format.  
 Use third party tool  
 Download  
 Contact  
 About Us

Binding site file preparation: Binding site file name must be site\_3d.txt.

The file file\_name\_protein.pdb has been uploaded. The file file\_name\_ligand.mol2 has been uploaded. The file file\_name\_site\_3d.txt has been uploaded.

**Step2**  
 Job with ID 188910559 is running. Wait till the job is done. It takes around 10 to 15 minutes.

**Welcome to the Result Page of MetaDOCK**

• MetaDOCK ran successfully.  
 • Total 15 solutions (AutoDock4: 5, i-DOCK: 5, and LeDock: 5) were generated.  
 • Total 15 solutions were rescored (AutoDock Vina) and clustered based on structural similarity (RMSD) of the docking poses.  
 • Dendrogram plot of the generated docking solutions. X-axis is the RMSD (Å).

**Largest cluster**

• Number of docking solutions in the largest cluster (RMSD cutoff: 2.5Å): 12

**RMSD Matrix of the Largest Cluster Docking solution.**

| Cluster                     | beta_vit_nucleoside_rank_0 | beta_vit_nucleoside_rank_1 | beta_vit_nucleoside_rank_2 | beta_vit_nucleoside_rank_3 | beta_vit_nucleoside_rank_4 | beta_vit_nucleoside_rank_5 | beta_vit_nucleoside_rank_6 | beta_vit_nucleoside_rank_7 | beta_vit_nucleoside_rank_8 | beta_vit_nucleoside_rank_9 | beta_vit_nucleoside_rank_10 | beta_vit_nucleoside_rank_11 | beta_vit_nucleoside_rank_12 |
|-----------------------------|----------------------------|----------------------------|----------------------------|----------------------------|----------------------------|----------------------------|----------------------------|----------------------------|----------------------------|----------------------------|-----------------------------|-----------------------------|-----------------------------|
| beta_vit_nucleoside_rank_0  | 0.00                       | 0.194                      | 0.468                      | 0.613                      | 0.772                      | 0.852                      | 0.902                      | 0.929                      | 0.952                      | 0.965                      | 0.975                       | 0.982                       | 0.987                       |
| beta_vit_nucleoside_rank_1  | 0.194                      | 0.00                       | 0.279                      | 0.424                      | 0.583                      | 0.663                      | 0.713                      | 0.739                      | 0.762                      | 0.775                      | 0.785                       | 0.792                       | 0.797                       |
| beta_vit_nucleoside_rank_2  | 0.468                      | 0.279                      | 0.00                       | 0.145                      | 0.304                      | 0.384                      | 0.434                      | 0.460                      | 0.473                      | 0.483                      | 0.490                       | 0.495                       | 0.499                       |
| beta_vit_nucleoside_rank_3  | 0.613                      | 0.424                      | 0.145                      | 0.00                       | 0.159                      | 0.239                      | 0.289                      | 0.315                      | 0.328                      | 0.338                      | 0.345                       | 0.350                       | 0.354                       |
| beta_vit_nucleoside_rank_4  | 0.772                      | 0.583                      | 0.304                      | 0.159                      | 0.00                       | 0.160                      | 0.240                      | 0.290                      | 0.316                      | 0.329                      | 0.339                       | 0.346                       | 0.351                       |
| beta_vit_nucleoside_rank_5  | 0.852                      | 0.663                      | 0.384                      | 0.239                      | 0.160                      | 0.00                       | 0.161                      | 0.241                      | 0.291                      | 0.317                      | 0.330                       | 0.340                       | 0.347                       |
| beta_vit_nucleoside_rank_6  | 0.902                      | 0.713                      | 0.434                      | 0.289                      | 0.240                      | 0.161                      | 0.00                       | 0.162                      | 0.242                      | 0.292                      | 0.318                       | 0.331                       | 0.341                       |
| beta_vit_nucleoside_rank_7  | 0.929                      | 0.739                      | 0.460                      | 0.315                      | 0.291                      | 0.241                      | 0.162                      | 0.00                       | 0.163                      | 0.243                      | 0.293                       | 0.319                       | 0.332                       |
| beta_vit_nucleoside_rank_8  | 0.952                      | 0.762                      | 0.473                      | 0.328                      | 0.316                      | 0.242                      | 0.163                      | 0.00                       | 0.164                      | 0.244                      | 0.294                       | 0.320                       | 0.333                       |
| beta_vit_nucleoside_rank_9  | 0.965                      | 0.775                      | 0.483                      | 0.338                      | 0.329                      | 0.243                      | 0.164                      | 0.00                       | 0.165                      | 0.245                      | 0.295                       | 0.321                       | 0.334                       |
| beta_vit_nucleoside_rank_10 | 0.975                      | 0.785                      | 0.490                      | 0.345                      | 0.339                      | 0.244                      | 0.165                      | 0.00                       | 0.166                      | 0.246                      | 0.296                       | 0.322                       | 0.335                       |
| beta_vit_nucleoside_rank_11 | 0.982                      | 0.792                      | 0.495                      | 0.350                      | 0.346                      | 0.245                      | 0.166                      | 0.00                       | 0.167                      | 0.247                      | 0.297                       | 0.323                       | 0.336                       |
| beta_vit_nucleoside_rank_12 | 0.987                      | 0.797                      | 0.499                      | 0.354                      | 0.351                      | 0.246                      | 0.167                      | 0.00                       | 0.168                      | 0.248                      | 0.298                       | 0.324                       | 0.337                       |

Figure S4: Screenshots of MetaDOCK web server input and output options.

**Figure S5**

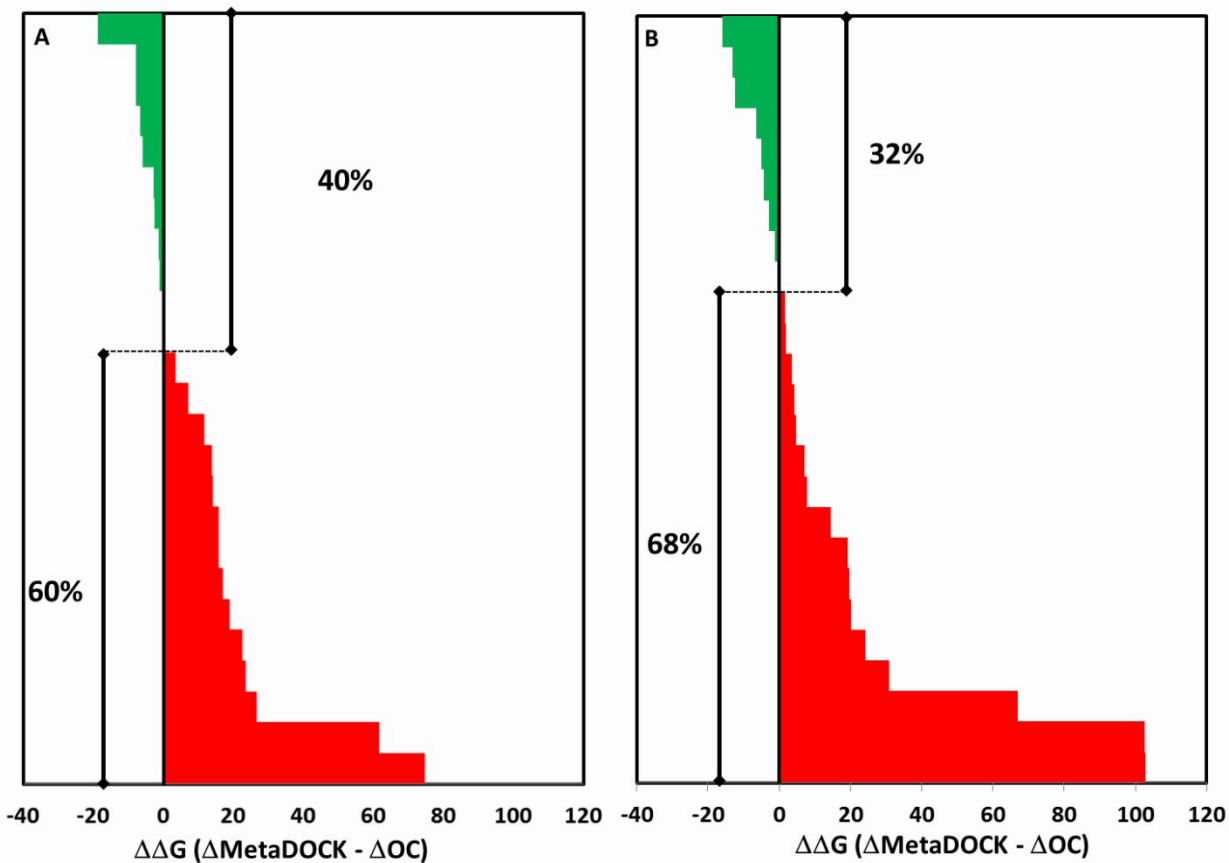

**Figure S5: Molecular dynamics (MD) simulation and MM-PBSA analysis based energy estimation of the docked complexes.** 25 randomly selected original and docked receptor-ligand complexes from the core dataset were subjected to MD simulations and ensembles of intermediate complexes were utilized to estimate the binding energy of the initial complex using MM-PBSA analysis. Panel A plots the gain/loss of binding free energies ( $\Delta\Delta G$ ;  $\Delta G$  of MetaDOCK complex minus  $\Delta G$  of original complex) of the docked complexes derived by MetaDOCK with respect to the original complexes (OC) obtained via experimental protocols. Panel B plots the gain/loss of binding free energies ( $\Delta\Delta G$ ;  $\Delta G$  of GOLD complex -  $\Delta G$  of original complex) of the docked complexes derived by GOLD with respect to the original complexes. Gain of binding free energy is colored by green while loss is marked in red color.

## Table S1

Table S1: List of decoy (ZINC database ID) and active (SMILE) ligands

| Decoy ligands |           |           |           |           |           |           |
|---------------|-----------|-----------|-----------|-----------|-----------|-----------|
| 1njs          | 1vso      | 2azr      | 2ojg      | 3bgs      | 3bkl      | 3ccw      |
| C02771309     | C03073566 | C05328570 | C04114703 | C20469550 | C04151710 | C02344757 |
| C04706417     | C16949218 | C01870309 | C19845630 | C20218695 | C04221838 | C09217291 |
| C04742125     | C36300217 | C04277632 | C18222565 | C37572045 | C08771640 | C09430293 |
| C09083603     | C37017697 | C19400497 | C21531687 | C37999690 | C12864243 | C01159910 |
| C09612395     | C37629146 | C19797619 | C40455146 | C20366344 | C13202476 | C12662478 |
| C09706090     | C37802121 | C19984013 | C42143885 | C40998426 | C13264303 | C13223873 |
| C09706176     | C37814579 | C20213555 | C55176565 | C41713968 | C08648184 | C09613482 |
| C09963312     | C37819303 | C20257807 | C55176654 | C41716912 | C20228003 | C13347106 |
| C12467458     | C37835022 | C23424096 | C50988064 | C42455800 | C20836302 | C13563545 |
| C13148456     | C38008018 | C26892217 | C62870366 | C44763553 | C20834699 | C20831714 |
| C13548749     | C38014952 | C28225414 | C71100313 | C49101835 | C20835498 | C20831732 |
| C14694401     | C38717771 | C32123984 | C72115976 | C49239809 | C20836053 | C20832234 |
| C05732521     | C40332304 | C12377656 | C72133037 | C50247829 | C20913860 | C20833868 |
| C01630966     | C40385630 | C35154874 | C79006545 | C51362372 | C20914435 | C20835411 |
| C20356905     | C40601322 | C13545780 | C79953758 | C38042848 | C20920855 | C20906722 |
| C20889995     | C41160028 | C37993495 | C85330884 | C40750410 | C20921133 | C20909767 |
| C21078577     | C42503561 | C42521987 | C85918152 | C61830688 | C20904921 | C21077817 |
| C21316758     | C42807612 | C42521333 | C86015747 | C62451927 | C20906681 | C21075934 |
| C25262387     | C44527145 | C42521365 | C86016299 | C62812477 | C20911598 | C21076748 |
| C25511754     | C44567405 | C42522073 | C87780168 | C63194712 | C20921681 | C21078869 |
| C31155655     | C44931536 | C43629422 | C87812953 | C63195118 | C21075486 | C21078926 |
| C31164863     | C44934218 | C45953210 | C87813020 | C68804406 | C21078083 | C21079559 |
| C31167925     | C45088608 | C48652893 | C87813376 | C69144163 | C21083898 | C23041698 |
| C31168211     | C49265832 | C18093757 | C87875403 | C70174569 | C21078740 | C24832323 |
| C35454599     | C49539317 | C57292824 | C88044579 | C70182625 | C21080346 | C25262013 |
| C35877936     | C49571621 | C43630398 | C90150369 | C70317739 | C21080462 | C32909866 |
| C36369722     | C50421097 | C61093782 | C91561390 | C70316959 | C21082069 | C09432078 |
| C37246160     | C50657232 | C62868149 | C92137907 | C70576916 | C21601594 | C39914013 |
| C14512219     | C59939139 | C62922255 | C92533517 | C70576698 | C21839466 | C43772313 |
| C38143588     | C61809339 | C62912888 | C92540564 | C71139933 | C16097287 | C09409213 |
| C38143828     | C65446854 | C62912928 | C92550890 | C71139934 | C09850378 | C09409199 |
| C59677403     | C70327580 | C63009435 | C92589705 | C80737246 | C36500687 | C09409279 |
| C08582306     | C77968819 | C63008918 | C93016380 | C83590625 | C36597643 | C08758420 |
| C63426950     | C80532042 | C45957055 | C93915826 | C85199360 | C37538276 | C16682658 |
| C67910476     | C80632642 | C70118954 | C94199074 | C85200086 | C39737866 | C16182373 |
| C67910700     | C80749054 | C70250545 | C94292217 | C85368920 | C39738035 | C32943067 |
| C67911342     | C83923985 | C71172455 | C94353584 | C85622716 | C43763797 | C32943068 |
| C67912156     | C50657082 | C71606226 | C94501163 | C87722907 | C58994356 | C12570131 |
| C67912604     | C88467662 | C16491505 | C94505943 | C87868224 | C58996998 | C13749693 |
| C67912760     | C89756337 | C17837334 | C94606621 | C87878329 | C59018591 | C14897439 |

|             |             |             |           |           |           |           |
|-------------|-------------|-------------|-----------|-----------|-----------|-----------|
| C67912918   | C90374922   | C85632650   | C94606647 | C88113667 | C59040032 | C53619553 |
| C67913019   | C91301205   | C85632711   | C94606998 | C88668196 | C35148266 | C46021909 |
| C68604313   | C91746441   | C86805212   | C94731521 | C90378817 | C20425202 | C66200627 |
| C70672689   | C92474952   | C90536497   | C94731522 | C90957036 | C67913753 | C66200669 |
| C72320427   | C92746053   | C91451689   | C94780893 | C91275011 | C67913756 | C16682565 |
| C78999668   | C93229560   | C91489413   | C43536858 | C91497034 | C70700713 | C73836772 |
| C78999672   | C95099970   | C92917266   | C95974048 | C93072154 | C77293241 | C73836732 |
| C85591177   | C97248307   | C95043887   | C40428523 | C93231619 | C77300830 | C13521432 |
| C85866878   | C97830879   | C95931546   | C96466089 | C94565329 | C85896106 | C96507876 |
| C31157904   | C97831555   | C96485299   | C97016339 | C94619934 | C98231039 | C33343435 |
|             |             |             |           |           |           |           |
| <b>3d0e</b> | <b>3h15</b> | <b>3l3m</b> |           |           |           |           |
| C07344923   | C02303660   | C04582489   |           |           |           |           |
| C09089463   | C00873423   | C07885935   |           |           |           |           |
| C09135472   | C08722830   | C00402253   |           |           |           |           |
| C09257519   | C03770019   | C20432256   |           |           |           |           |
| C09706127   | C08853094   | C21811903   |           |           |           |           |
| C12325445   | C09254310   | C35611996   |           |           |           |           |
| C12644701   | C09260573   | C36264721   |           |           |           |           |
| C13127515   | C01288715   | C36779274   |           |           |           |           |
| C14532697   | C09382088   | C36961528   |           |           |           |           |
| C19219587   | C09493253   | C37377064   |           |           |           |           |
| C02927398   | C03428043   | C37441779   |           |           |           |           |
| C15970091   | C09549511   | C43095737   |           |           |           |           |
| C22911888   | C09576385   | C43460849   |           |           |           |           |
| C27267900   | C09611404   | C48403173   |           |           |           |           |
| C32870922   | C10736869   | C49122796   |           |           |           |           |
| C25174062   | C12592951   | C59204645   |           |           |           |           |
| C35682662   | C13005145   | C61692179   |           |           |           |           |
| C06878694   | C13058928   | C68585946   |           |           |           |           |
| C03670434   | C13728643   | C76578168   |           |           |           |           |
| C06363416   | C13936396   | C83236425   |           |           |           |           |
| C38573992   | C16013901   | C85685851   |           |           |           |           |
| C39218222   | C17444844   | C86079495   |           |           |           |           |
| C39218226   | C18063653   | C87238630   |           |           |           |           |
| C39729643   | C20348258   | C88126015   |           |           |           |           |
| C43472007   | C20424330   | C90249395   |           |           |           |           |
| C49451322   | C21080938   | C90948411   |           |           |           |           |
| C49545405   | C24829362   | C92774904   |           |           |           |           |
| C50120504   | C25147238   | C92775729   |           |           |           |           |
| C54615476   | C27308228   | C94484465   |           |           |           |           |
| C44388890   | C35623034   | C94668690   |           |           |           |           |
| C06213078   | C39363028   | C94786410   |           |           |           |           |
| C15936478   | C39920012   | C97098058   |           |           |           |           |
| C63229078   | C36639997   | C97411754   |           |           |           |           |
| C63303048   | C15959258   | C97520474   |           |           |           |           |



|                       |                                                                                              |           |  |  |  |  |
|-----------------------|----------------------------------------------------------------------------------------------|-----------|--|--|--|--|
| C63472972             | C49467311                                                                                    | C97521185 |  |  |  |  |
| C40051793             | C09409755                                                                                    | C97582101 |  |  |  |  |
| C64481796             | C58893421                                                                                    | C97624888 |  |  |  |  |
| C67602146             | C20290811                                                                                    | C97622886 |  |  |  |  |
| C68489525             | C15899957                                                                                    | C97645297 |  |  |  |  |
| C69040236             | C31691335                                                                                    | C97645298 |  |  |  |  |
| C72008601             | C16440820                                                                                    | C97694119 |  |  |  |  |
| C72097076             | C72460488                                                                                    | C97737356 |  |  |  |  |
| C77971441             | C03263279                                                                                    | C97768026 |  |  |  |  |
| C95455793             | C36357469                                                                                    | C97768365 |  |  |  |  |
| C20589094             | C64991311                                                                                    | C97768461 |  |  |  |  |
| C97111374             | C96115566                                                                                    | C97768462 |  |  |  |  |
| C97256118             | C96579176                                                                                    | C97768472 |  |  |  |  |
| C97472935             | C96918752                                                                                    | C97768543 |  |  |  |  |
| C97938414             | C98064929                                                                                    | C97796189 |  |  |  |  |
| C20572979             | C09420471                                                                                    | C97892153 |  |  |  |  |
| <b>Active ligands</b> |                                                                                              |           |  |  |  |  |
| <b>1njs</b>           | <chem>c1cc(ccc1C(CCCc2c(nc([nH]c2=O)N)N)C(C(F)(F)F)(O)O)C(=O)NC(CCC(=O)[O-])C(=O)[O-]</chem> |           |  |  |  |  |
| <b>1vso</b>           | <chem>CC(C)(C)c1c(c(no1)OCP(=O)(O)O)CC(C(=O)[O-])[NH3+]</chem>                               |           |  |  |  |  |
| <b>2azr</b>           | <chem>c1cc2c(c(sc2nc1)C(=O)[O-])OCC(=O)[O-]</chem>                                           |           |  |  |  |  |
| <b>2ojg</b>           | <chem>CN(C)C(=O)c1cc(c[nH]1)c2c(c[nH]2)c3ccccc3</chem>                                       |           |  |  |  |  |
| <b>3bgs</b>           | <chem>c1c(c2c([nH]1)c(=O)[nH]cn2)C[N@@H+]3CC(C(C3)O)CO</chem>                                |           |  |  |  |  |
| <b>3bkl</b>           | <chem>c1ccc(cc1)CC(C(CCC(=O)NC(Cc2c[nH]c3c2cccc3)C(=O)[O-])(O)O)NC(=O)c4ccccc4</chem>        |           |  |  |  |  |
| <b>3ccw</b>           | <chem>CC(C)c1c(nc(n1CCC(CC(CC(=O)[O-])O)O)c2ccc(cc2)F)C(=O)NCc3ccccc3</chem>                 |           |  |  |  |  |
| <b>3d0e</b>           | <chem>CCn1c2c(cnc(c2nc1c3c(non3)N)C#CC(C)(C)O)OC[C@@H]4CCCC[NH2+]C4</chem>                   |           |  |  |  |  |
| <b>3hl5</b>           | <chem>CC1CCN(C1C(=O)Nc2cccc2c3nccc3)C(=O)C(C4CCCC4)NC(=O)C(C)NC</chem>                       |           |  |  |  |  |
| <b>3l3m</b>           | <chem>C1CCN=C(C1)C2=C=C/C(=C\3/[nH]c4=C=C=C=C(c4n3)C(=O)N)/C#C2)F</chem>                     |           |  |  |  |  |

## Table S2

**Table S2:** Binding free energy ( $\Delta G$ ) and its enthalpy ( $\Delta H$ ) and entropy ( $T\Delta S$ ) components of the docked complexes.

| Protein PDB code | $\Delta H$ | $T\Delta S$ | MetaDOCK $\Delta G$ | $\Delta H$ | $T\Delta S$ | GOLD LCTS $\Delta G$ |
|------------------|------------|-------------|---------------------|------------|-------------|----------------------|
| 1a30             | -8.7098    | 53.9967     | 45.2869             | -10.0125   | 92.6053     | 82.5928              |
| 1bzc             | -72.096    | 45.4253     | -26.6707            | -62.5775   | 57.5267     | -5.0508              |
| 1e66             | -25.991    | 3.05        | -22.9411            | -24.9964   | 5.6946      | -19.3018             |
| 1g2K             | -65.5097   | 7.8716      | -57.6381            | -68.4204   | 6.7683      | -61.6521             |
| 1gpk             | -35.7663   | 19.6986     | -16.0677            | -27.5549   | 20.217      | -7.3379              |
| 1gpn             | -34.0811   | 12.2894     | -21.7917            | -29.622    | 15.2212     | -14.4009             |
| 1h22             | -57.6192   | 24.6167     | -33.0025            | -51.6329   | 38.2703     | -13.3626             |
| 1h23             | -48.594    | 24.2779     | -24.3161            | -53.1166   | 32.8869     | -20.2297             |
| 1k1i             | -13.9784   | 27.4128     | 13.4344             | -28.8186   | 10.6166     | -18.202              |
| 1mq6             | -46.4644   | 6.0818      | -40.3826            | -38.2197   | 17.5104     | -20.7093             |
| 1nc1             | -54.4205   | 6.7144      | -47.7061            | -50.0992   | 9.4507      | -40.6485             |
| 1nc3             | -52.5042   | 13.9924     | -38.5118            | -47.8489   | 14.3562     | -33.4927             |
| 1o0h             | -20.6441   | 98.0475     | 77.4034             | -15.7896   | 53.6677     | 37.8781              |
| 1o3f             | -10.1038   | 12.9919     | 2.888               | -3.9803    | 43.2834     | 39.3032              |
| 1p1n             | -76.2798   | 14.9823     | -61.2975            | -77.3348   | 13.7743     | -63.5605             |
| 1p1q             | -61.6347   | 16.2662     | -45.3686            | -49.2162   | 6.3635      | -42.8527             |
| 1pxn             | -38.3645   | 16.8704     | -21.4941            | -36.8309   | 8.6973      | -28.1336             |
| 1q8t             | -31.5377   | 32.0804     | 0.5427              | -26.2386   | 42.9767     | 16.7381              |
| 1q8u             | -32.9547   | 15.1755     | -17.7792            | -27.4604   | 33.5319     | 6.0714               |
| 1qf1             | -45.9112   | 11.2548     | -34.6564            | -8.1421    | 5.2777      | -2.8644              |
| 1u1b             | -26.6982   | 75.3254     | 48.6272             | -15.4971   | 113.9202    | 98.4231              |
| 1vso             | -35.0855   | 64.2459     | 29.1604             | -32.0921   | 41.8096     | 9.7174               |
| 1w4o             | -30.7797   | 64.8397     | 34.0601             | -19.5499   | 81.8837     | 62.3337              |
| 1y6r             | -74.6746   | 17.2623     | -57.4123            | -70.5982   | 17.1464     | -53.4518             |
| 1ydt             | -39.5083   | 23.9727     | -15.5356            | -42.01     | 20.0171     | -21.993              |
| 1z6e             | -42.9263   | 30.6212     | -12.3052            | -43.8338   | 39.8768     | -3.9569              |
| 1z95             | -45.0795   | 3.9549      | -41.1247            | -33.0145   | 16.8125     | -16.202              |
| 2br1             | -32.5252   | 9.7488      | -22.7764            | -36.397    | 10.5492     | -25.8478             |
| 2c3i             | -30.0281   | 22.528      | -7.5001             | -29.4826   | 12.2918     | -17.1908             |
| 2cet             | -42.2342   | 13.0306     | -29.2036            | -36.6997   | 26.1526     | -10.547              |
| 2fvd             | -32.8855   | 12.804      | -20.0814            | -32.9661   | 17.1438     | -15.8223             |
| 2fxs             | -38.5532   | 21.9056     | -16.6476            | -40.6815   | 14.0508     | -26.6308             |
| 2p4y             | -66.9097   | 25.9356     | -40.974             | -58.3624   | 41.0921     | -17.2702             |
| 2pog             | -33.7439   | 42.6209     | 8.877               | -39.0371   | 3.9894      | -35.0477             |
| 2qnq             | -48.1579   | 13.6191     | -34.5388            | -43.8944   | 36.2002     | -7.6942              |

|      |          |         |          |          |         |          |
|------|----------|---------|----------|----------|---------|----------|
| 2r9w | -24.7684 | 54.156  | 29.3876  | -27.8882 | 33.3502 | 5.462    |
| 2v00 | -12.0351 | 15.973  | 3.9387   | -9.1484  | 27.7831 | 18.6348  |
| 2vkm | -85.3358 | 15.8207 | -69.5151 | -60.6092 | 26.1537 | -34.4555 |
| 2w4x | -36.2395 | 9.5797  | -26.6598 | -38.8262 | 13.0915 | -25.7348 |
| 2wn9 | -19.7543 | 44.7196 | 24.9653  | -22.0459 | 22.3735 | 0.3276   |
| 2xbv | -41.3676 | 27.389  | -13.9787 | -29.7239 | 19.0828 | -10.6411 |
| 2xdl | -27.6593 | 7.4592  | -20.2001 | -23.5611 | 13.8365 | -9.7247  |
| 2xii | -60.3533 | 15.3822 | -44.9711 | -44.8151 | 33.6093 | -11.2058 |
| 2xnb | -39.8842 | 21.2509 | -18.6333 | -39.1846 | 26.1401 | -13.0445 |
| 2y5h | -30.4771 | 48.2747 | 17.7976  | -40.0084 | 29.8167 | -10.1917 |
| 2yfe | -39.2405 | 25.1145 | -14.126  | -34.5456 | 22.1913 | -12.3543 |
| 2ymd | -31.461  | 12.2175 | -19.2434 | -26.0512 | 19.2683 | -6.783   |
| 2zb1 | -41.8746 | 11.7449 | -30.1296 | -34.2215 | 12.0182 | -22.2033 |
| 2zcg | -32.6249 | 17.0938 | -15.531  | -6.1927  | 85.9201 | 79.7274  |
| 2zcr | -31.7353 | 84.1938 | 52.4585  | -34.5783 | 10.3189 | -24.2594 |
| 2zy1 | -48.3098 | 33.8874 | -14.4224 | -19.9591 | 80.5186 | 60.5596  |
| 3ao4 | -23.0445 | 7.4853  | -15.5592 | -22.6893 | 4.691   | -17.9983 |
| 3arq | -20.62   | 36.2522 | 15.6322  | -14.1085 | 86.949  | 72.8405  |
| 3aru | -12.0714 | 9.6704  | -2.4009  | -34.2215 | 12.0182 | 7.2858   |
| 3b65 | -51.2795 | 5.6219  | -45.6576 | -53.1562 | 2.8951  | -50.2611 |
| 3coy | -54.2067 | 15.0807 | -39.126  | -48.6586 | 49.1651 | 0.5065   |
| 3coz | -37.1227 | 30.0852 | -7.0375  | -37.7669 | 14.4145 | -23.3524 |
| 3d6q | -23.1097 | 30.1963 | 7.0866   | -20.3191 | 41.9433 | 21.6243  |
| 3dd0 | -19.3596 | 3.374   | -15.9856 | -19.2021 | 10.811  | -8.391   |
| 3dx2 | -35.0055 | 75.4605 | 40.455   | -50.4108 | 73.7139 | 23.3031  |
| 3e93 | -55.2543 | 22.4204 | -32.8339 | -55.0035 | 32.5704 | -22.433  |
| 3ebp | -31.8475 | 30.5596 | -1.2879  | -25.7526 | 39.5179 | 13.7653  |
| 3ehy | -13.1721 | 38.2027 | 25.0305  | 28.9525  | 37.0396 | 65.9922  |
| 3f3a | -21.6678 | 19.5333 | -2.1345  | -33.2631 | 8.0211  | -25.242  |
| 3f3c | -34.1494 | 10.5692 | -25.238  | -34.1625 | 8.9246  | -23.5802 |
| 3f3d | -29.7627 | 4.6396  | -25.1231 | -31.0775 | 16.6078 | -14.4697 |
| 3f3e | -22.7684 | 14.8827 | -7.8857  | -28.6417 | 11.0141 | -17.6275 |
| 3fv1 | -75.1285 | 10.047  | -65.0814 | -82.0116 | 24.0766 | -57.935  |
| 3g2n | -31.2668 | 0.1695  | -31.0974 | -32.7916 | 2.0745  | -30.7171 |
| 3g2z | -10.3289 | 24.0178 | 13.6889  | -3.6007  | 18.7722 | 15.1714  |
| 3g31 | -7.3538  | 31.8788 | 24.525   | -10.8918 | 18.0691 | 7.1773   |
| 3gc5 | -47.3835 | 12.645  | -34.7385 | -39.9409 | 16.0114 | -23.9294 |
| 3ge7 | -70.0609 | 23.6541 | -46.4068 | -70.3986 | 34.3946 | -36.004  |
| 3gnw | -42.1173 | 16.3369 | -25.7804 | -27.2983 | 26.2258 | -1.0725  |
| 3gy4 | -24.3089 | 10.6072 | -13.7016 | -28.2053 | 20.634  | -7.5713  |
| 3ivg | -33.0444 | 34.3209 | 1.2765   | -35.5339 | 34.3285 | -1.2054  |

|      |          |         |          |          |         |          |
|------|----------|---------|----------|----------|---------|----------|
| 3jvr | -26.407  | 5.6368  | -20.7702 | -17.1235 | 17.7991 | 0.6755   |
| 3jya | -27.4977 | 9.1229  | -18.3748 | -19.6081 | 2.7338  | -16.8744 |
| 3k5v | -33.1151 | 15.0098 | -18.1053 | -29.3655 | 5.4619  | -23.9036 |
| 3lka | -14.2824 | 5.6489  | -8.6335  | 0.0125   | 42.5043 | 42.5168  |
| 3mss | -34.8436 | 32.7516 | -2.092   | -19.6243 | 24.8391 | 5.2148   |
| 3nw9 | -62.8799 | 6.6802  | -56.1996 | -53.6621 | 38.2016 | -15.4605 |
| 3nx7 | -24.9058 | 6.8814  | -18.0244 | -40.2958 | 30.9415 | -9.3543  |
| 3pww | -31.6892 | 47.7495 | 16.0603  | -17.2671 | 76.9598 | 59.6928  |
| 3pxf | -17.7868 | 28.1985 | 10.4117  | -17.965  | 27.3847 | 9.4197   |
| 3qqs | -38.4756 | 57.9534 | 19.4778  | -40.2958 | 53.2552 | 12.9594  |
| 3rsx | -20.0335 | 5.8309  | -14.2027 | -16.0667 | 5.552   | -10.5148 |
| 3tsk | -35.5859 | 18.3935 | -17.1925 | -47.7953 | 39.759  | -8.0363  |
| 3up2 | -47.0033 | 20.9989 | -26.0044 | -40.1954 | 49.2852 | 9.0898   |
| 3wz8 | -25.7754 | 22.581  | -3.1944  | -15.8983 | 12.4391 | -3.4592  |
| 3zsx | -25.3945 | 45.8971 | 20.5025  | -30.8961 | 13.0592 | -17.8369 |
| 4abg | -30.4833 | 22.5583 | -7.925   | -32.0245 | 33.1284 | 1.1039   |
| 4cr9 | -15.4824 | 4.1508  | -11.3316 | -17.6352 | 7.5807  | -10.0544 |
| 4crc | -42.0568 | 19.244  | -22.8129 | -28.1593 | 17.6998 | -10.4595 |
| 4ddk | -16.5801 | 44.4249 | 27.8448  | -24.0306 | 35.5363 | 11.5057  |
| 4de1 | -35.0006 | 10.3635 | -24.6372 | -36.7626 | 7.3726  | -29.39   |
| 4e5w | -45.0814 | 15.2478 | -29.8337 | -40.0635 | 19.6261 | -20.4374 |
| 4ea2 | -39.1985 | 24.798  | -14.4005 | -36.383  | 24.624  | -11.759  |
| 4eky | -49.4172 | 10.0363 | -39.3809 | -34.3675 | 21.8691 | -12.4983 |
| 4eo8 | -32.2379 | 10.6243 | -21.6136 | -16.4345 | 12.4519 | -3.9826  |
| 4eor | -37.014  | 10.4703 | -26.5437 | -33.6511 | 8.658   | -24.993  |
| 4f3c | -67.6257 | 7.6022  | -60.0235 | -67.2941 | 18.7661 | -48.528  |
| 4gid | -98.3348 | 27.2702 | -71.0646 | -51.1553 | 28.5677 | -22.5875 |
| 4gkm | -42.4938 | 22.3107 | -20.1831 | -48.0311 | 16.2167 | -31.8    |
| 4ih5 | -11.2629 | 10.7087 | -0.5542  | -15.9847 | 8.6628  | -7.322   |
| 4j28 | -44.3898 | 3.391   | -40.9989 | -35.8268 | 6.1062  | -29.7206 |
| 4j3l | -41.1435 | 18.6269 | -22.5166 | -37.7471 | 10.3096 | -27.4375 |
| 4jia | -16.7576 | 48.9493 | 32.1917  | -29.1034 | 32.4787 | 3.3753   |
| 4jxs | -18.8517 | 51.2935 | 32.4418  | -23.2746 | 45.1003 | 21.8256  |
| 4k18 | -34.9256 | 17.8497 | -17.0758 | -31.5843 | 11.848  | -19.7363 |
| 4kz6 | -27.831  | 36.6445 | 8.8135   | -17.8255 | 30.9468 | 13.1212  |
| 4lzs | -25.353  | 7.5563  | -17.7966 | -20.9126 | 7.5755  | -13.3371 |
| 4m0y | -28.3416 | 9.2274  | -19.1142 | -28.9964 | 3.8099  | -25.1865 |
| 4mgd | -36.3738 | 14.0255 | -22.3483 | -37.7667 | 5.633   | -32.1337 |
| 4ogj | -27.0466 | 15.8596 | -11.187  | -40.6935 | 31.3199 | -9.3736  |
| 4owm | -14.4868 | 38.3475 | 23.8607  | -19.4574 | 25.1726 | 5.7151   |
| 4pcs | -40.7213 | 24.8413 | -15.88   | -35.1904 | 26.926  | -8.2644  |

|      |          |         |          |          |         |          |
|------|----------|---------|----------|----------|---------|----------|
| 4qac | -27.8732 | 11.2577 | -16.6156 | -33.8292 | 7.1536  | -26.6756 |
| 4qd6 | -27.1837 | 16.5212 | -10.6624 | -25.7229 | 12.7383 | -12.9846 |
| 4rfm | -42.444  | 7.6911  | -34.7529 | -43.4038 | 17.8906 | -25.5133 |
| 4tmn | -18.0458 | 27.3577 | 9.3119   | 0.2235   | 9.3538  | 9.5773   |
| 4twp | -34.0136 | 22.3703 | -11.6433 | -34.7757 | 24.7268 | -10.0489 |
| 4ty7 | -47.8529 | 19.6855 | -28.1674 | -48.4279 | 17.4008 | -31.0271 |
| 4w9c | -37.4796 | 6.7453  | -30.7343 | -41.4515 | 7.3453  | -34.1063 |
| 4w9h | -41.6551 | 19.223  | -22.4322 | -45.1633 | 7.3418  | -37.821  |
| 4w9i | -39.2278 | 11.5812 | -27.6466 | -36.9582 | 6.8848  | -30.0735 |
| 4w9l | -42.2234 | 16.6037 | -25.6198 | -46.1433 | 8.5245  | -37.6189 |
| 5a7b | -45.779  | 16.785  | -28.994  | -32.5857 | 68.8938 | 36.3081  |
| 5c28 | -12.2026 | 4.4592  | -7.7434  | -11.7765 | 12.3174 | 0.5409   |
| 5dwr | -36.582  | 16.4716 | -20.1103 | -43.5795 | 25.0369 | -18.5426 |
